# Supplementary material for: Does a research article's country of origin affect perception of its quality and relevance? A national trial of US public health researchers
Source: HighWire-hosted journal article supplement (doi:10.1136/bmjopen-2015-008993), 2015-12-01
Supplement: bmjopen-2015-008993supp.pdf [file bmjopen-2015-008993supp.pdf]

## Appendix 1: CEPH accredited Institutions

| <b>Institution</b>                              | <b>Department/Division</b>                  | <b>CEPH School or Program</b> |
|-------------------------------------------------|---------------------------------------------|-------------------------------|
| Johns Hopkins Bloomberg School of Public Health | Health Policy and Management                | School                        |
|                                                 | International Health                        | School                        |
|                                                 | Health Behaviour and Society                | School                        |
|                                                 | Population Family and Reproductive Health   | School                        |
|                                                 | Epidemiology                                | School                        |
|                                                 | Environmental Health Sciences               | School                        |
|                                                 | Molecular Microbiology                      | School                        |
|                                                 | Biostatistics                               | School                        |
|                                                 | Mental Health                               | School                        |
|                                                 | Harvard School of Public Health             | Biostatistics                 |
| Environmental Health                            |                                             | School                        |
| Epidemiology                                    |                                             | School                        |
| Genetics                                        |                                             | School                        |
| Global Health                                   |                                             | School                        |
| Health Policy                                   |                                             | School                        |
| Immunology                                      |                                             | School                        |
| Nutrition                                       |                                             | School                        |
| Social and Behavioural                          |                                             | School                        |
| Columbia Mailman School of Public Health        |                                             | Biostatistics                 |
|                                                 | Environmental Health Science                | School                        |
|                                                 | Epidemiology                                | School                        |
|                                                 | Health Policy and Management                | School                        |
|                                                 | Population Health and Family Health         | School                        |
|                                                 | Sociomedical Sciences                       | School                        |
|                                                 | Boston University - School of Public Health | Biostatistics                 |
| Community Health sciences                       |                                             | School                        |
| Environmental Health                            |                                             | School                        |
| Epidemiology                                    |                                             | School                        |
| Global Health                                   |                                             | School                        |
| Health Law, Bioethics and Human Rights          |                                             | School                        |
| Health Policy and Management                    |                                             | School                        |
| Dept. Family Medicine                           |                                             | School                        |
| Dept. Paediatrics*                              |                                             | School                        |
| Dept. Psychiatry and Human Behaviour            |                                             | School                        |
| Colorado School of Public Health                | Biostatistics                               | School                        |
|                                                 | Community and Behaviour                     | School                        |

|                                                                           |                                                   |         |
|---------------------------------------------------------------------------|---------------------------------------------------|---------|
|                                                                           | Environmental and Occupational Health             | School  |
|                                                                           | Epidemiology                                      | School  |
|                                                                           | Health Systems Management                         | School  |
| CUNY School of Public Health                                              |                                                   | School  |
| Geisel School of Medicine, Dartmouth                                      | Institute for Health Policy and Clinical Practice | Program |
| Drexel School of public health                                            | Epidemiology and Biostatistics                    | School  |
|                                                                           | Health Management and Policy                      | School  |
|                                                                           | Environmental and Occupational Health             | School  |
|                                                                           | Community Health and Prevention                   | School  |
| East Tennessee State University College of Public Health                  | Biostatistics                                     | School  |
|                                                                           | Community and Behavioural Health                  | School  |
|                                                                           | Environmental Health                              | School  |
|                                                                           | Health sciences                                   | School  |
|                                                                           | Health Services Management and Policy             | School  |
| Emory Rollins School of Public Health                                     | Behavioural Science                               | School  |
|                                                                           | Biostatistics                                     | School  |
|                                                                           | Environmental Health                              | School  |
|                                                                           | Epidemiology                                      | School  |
|                                                                           | Health Policy and Management                      | School  |
|                                                                           | Global Health                                     | School  |
| Florida A and M University Institute of Public Health                     |                                                   | Program |
| Florida International University Rob Stempel College of Public Health and | Biostatistics                                     | School  |
|                                                                           | Dietetics and nutrition                           | School  |
|                                                                           | Environmental and occupational health             | School  |
|                                                                           | Epidemiology                                      | School  |
|                                                                           | Health policy and management                      | School  |
|                                                                           | Health promotion and disease prevention           | School  |
|                                                                           | Social work                                       | School  |
| George Washington university Milken Institute School of Public Health     | Environmental and occupational health             | School  |
|                                                                           | Epidemiology and Biostatistics                    | School  |
|                                                                           | Global Health                                     | School  |
|                                                                           | Exercise and nutrition sciences                   | School  |
|                                                                           | Health policy                                     | School  |
|                                                                           | Health services management and leadership         | School  |
|                                                                           | Prevention and Community Health                   | School  |
| Georgia Regents University Institute of Public and Preventative Health    | Biostatistics and Epidemiology                    | Program |
| Georgia Southern University Jiann-Ping Hsu College of Public Health       | Biostatistics                                     | School  |
|                                                                           | Dept. Community Health                            | School  |
|                                                                           | Environmental Health                              | School  |

|                                                                           |                                                |         |
|---------------------------------------------------------------------------|------------------------------------------------|---------|
|                                                                           | Dept. of Epidemiology                          | School  |
|                                                                           | Dept. Health Policy and Management             | School  |
| Georgia State University MPH program                                      |                                                | Program |
| Icahn School of Medicine at Mount Sinai Grad program in Public Health     |                                                | Program |
| Indiana University Richard M Fairbanks School of Public Health            | Epidemiology                                   | School  |
|                                                                           | Behavioural Sciences                           | School  |
|                                                                           | Health Policy and Management                   | School  |
|                                                                           | Environmental Health                           | School  |
|                                                                           | Biostatistics                                  | School  |
| Loma Linda University School of Public Health*                            |                                                | School  |
| Louisiana State University Health Sciences Centre School of Public Health | Behavioural and Community Health Sciences      | School  |
|                                                                           | Biostatistics                                  | School  |
|                                                                           | Environmental and Occupational Health Sciences | School  |
|                                                                           | Epidemiology                                   | School  |
|                                                                           | Health Policy and Systems Management           | School  |
| Mercer University Master of Public Health Programme                       |                                                | Program |
| New York Medical College and Institute of Public Health - School of       |                                                | Program |
| New York Medical College and Institute of Public Health - School of       |                                                | Program |
| North-eastern University Master of Public Health Programme in Urban       |                                                | Program |
| North-western University Feinberg School of Medicine Programs in Public   |                                                | Program |
| Ohio State University College of Public Health                            | Biostatistics                                  | School  |
|                                                                           | Centre for public health practice*             | School  |
|                                                                           | Environmental health sciences                  | School  |
|                                                                           | Epidemiology                                   | School  |
|                                                                           | Health behaviour and health promotion          | School  |
|                                                                           | Centre for health outcomes                     | School  |
|                                                                           | Health services management and policy          | School  |
| Oregon Health and Science University/Portland State University            |                                                | Program |
| Oregon State University College of Public Health and Human Sciences*      |                                                | School  |
| Pennsylvania State University MPH Program                                 | Biostatistics and bioinformatics               | Program |
|                                                                           | Epidemiology                                   | Program |
|                                                                           | Health services and behavioural research       | Program |
| Rutgers School of Public Health                                           |                                                | School  |
| Saint Louis State University College for Public Health and Social Justice | Dept. behavioural science and education        | School  |
|                                                                           | Dept. biostatistics                            | School  |
|                                                                           | Dept. environmental and occupational health    | School  |
|                                                                           | Dept. epidemiology                             | School  |

|                                                                             |                                         |         |
|-----------------------------------------------------------------------------|-----------------------------------------|---------|
|                                                                             | Dept. health management and policy      | School  |
| San Diego State university graduate school of public health                 |                                         | School  |
| St Georges University Department of Public Health and Preventative          | Epidemiology                            | Program |
|                                                                             | Environmental and occupational track    | Program |
|                                                                             | Health policy and administration track  | Program |
|                                                                             | MD/MPH track                            | Program |
| Stony Brook University Program in Public Health                             |                                         | Program |
| SUNY Downstate Medical Centre School of Public Health                       |                                         | School  |
| Temple University College of Public Health                                  |                                         | Program |
| Texas A+M Health Science Centre School of Public Health                     |                                         | School  |
| Thomas Jefferson University, School of Population Health                    |                                         | Program |
| Touro University - California MPH Program                                   |                                         | Program |
| Tufts University School of Medicine, Public Health Program                  |                                         | Program |
| Tulane University School of Public Health and Tropical Medicine             | Biostatistics and Bioinformatics        | School  |
|                                                                             | Epidemiology                            | School  |
|                                                                             | Global Community health                 | School  |
|                                                                             | Global environmental sciences           | School  |
|                                                                             | Tropical medicine                       | School  |
|                                                                             | Global health systems and development   | School  |
| UCLA Jonathan and Karin Fielding School of Public Health                    | Environmental Health Sciences           | School  |
|                                                                             | Epidemiology                            | School  |
|                                                                             | Community Health Sciences               | School  |
|                                                                             | Health Policy and Management            | School  |
|                                                                             | Biostatistics                           | School  |
| Uniformed Services University of the Health Sciences Public Health Program* |                                         | Program |
| University at Albany SUNY School of Public Health                           | Biomedical sciences Infectious diseases | School  |
|                                                                             | Environmental health sciences           | School  |
|                                                                             | Epidemiology and biostatistics          | School  |
|                                                                             | Health policy management and behaviour  | School  |
| University at Buffalo SUNY School of Public Health and Health Professions   | Biostatistics                           | School  |
|                                                                             | Community health and health behaviour   | School  |
|                                                                             | Epidemiology and environmental health   | School  |
|                                                                             | Exercise and nutrition sciences         | School  |
|                                                                             | Rehabilitation science                  | School  |
| University of Alabama at Birmingham School of Public Health                 | Biostatistics                           | School  |
|                                                                             | Environmental health sciences           | School  |
|                                                                             | Epidemiology                            | School  |
|                                                                             | Health behaviour                        | School  |
|                                                                             | Healthcare organization and behaviour   | School  |

|                                                                       |                                                |         |
|-----------------------------------------------------------------------|------------------------------------------------|---------|
| University of Arizona Mel and Enid Zuckerman College of Public Health | Biostatistics                                  | School  |
|                                                                       | Environmental Health Sciences                  | School  |
|                                                                       | Epidemiology                                   | School  |
|                                                                       | Family and Child Health                        | School  |
|                                                                       | Health Behaviour and Health promotions         | School  |
|                                                                       | Health services administrations                | School  |
|                                                                       | Public health policy and management            | School  |
|                                                                       | Public health practice                         | School  |
| University of Arkansas for Medical Sciences Fay W. Boozman College of | Biostatistics                                  | School  |
|                                                                       | Environmental and Occupational Health          | School  |
|                                                                       | Epidemiology                                   | School  |
|                                                                       | Health behaviour and health education          | School  |
| University of California, Berkeley School of Public Health            | Health Policy and Management                   | School  |
|                                                                       | Biostatistics                                  | School  |
|                                                                       | Environmental Health sciences                  | School  |
|                                                                       | Epidemiology                                   | School  |
|                                                                       | Health and Social Behaviour                    | School  |
|                                                                       | Health Policy and Management                   | School  |
|                                                                       | Health services and policy analysis            | School  |
|                                                                       | Infectious disease and vaccinology             | School  |
| University of California, Davis MPH Program                           | Maternal and Child Health                      | School  |
|                                                                       | Public Health nutrition                        | School  |
| University of California, Irvine Program in Public Health             |                                                | Program |
| University of Cincinnati College of Medicine MPH Program              |                                                | Program |
|                                                                       | Biostatistics                                  | Program |
|                                                                       | Environmental Public Health                    | Program |
|                                                                       | Epidemiology                                   | Program |
|                                                                       | Health education                               | Program |
|                                                                       | Health services Management                     | Program |
|                                                                       | Occupational Public Health                     | Program |
| University of Florida College of Public Health and Health Professions | Behavioural science and community health       | School  |
|                                                                       | Biostatistics                                  | School  |
|                                                                       | Clinical and health psychology                 | School  |
|                                                                       | Environmental and global health                | School  |
|                                                                       | Epidemiology                                   | School  |
|                                                                       | Health services research management and policy | School  |
|                                                                       | Occupational health                            | School  |
|                                                                       | Physical therapy                               | School  |
|                                                                       | Rehabilitation science                         | School  |

|                                                                        |                                                                           |                                                |        |
|------------------------------------------------------------------------|---------------------------------------------------------------------------|------------------------------------------------|--------|
| University of Georgia College of Public Health                         | Speech language and hearing sciences                                      | School                                         |        |
|                                                                        | Epidemiology and biostatistics                                            | School                                         |        |
|                                                                        | Environmental health science                                              | School                                         |        |
|                                                                        | Health policy and management                                              | School                                         |        |
| University of Hawaii, Manoa Public Health Program                      | Health promotion and behaviour                                            | School                                         |        |
|                                                                        |                                                                           | Program                                        |        |
| University of Illinois at Chicago School of Public Health              | Community health sciences                                                 | School                                         |        |
|                                                                        | Environmental and occupational health sciences                            | School                                         |        |
|                                                                        | Epidemiology and biostatistics                                            | School                                         |        |
|                                                                        | Health policy and administration                                          | School                                         |        |
| University of Iowa College of Public Health                            | Biostatistics                                                             | School                                         |        |
|                                                                        | Community and behavioural health                                          | School                                         |        |
|                                                                        | Epidemiology                                                              | School                                         |        |
|                                                                        | Health management and policy                                              | School                                         |        |
|                                                                        | Occupational and environmental health                                     | School                                         |        |
|                                                                        |                                                                           | Program                                        |        |
| University of Kansas School of Medicine KU - MPH Program Kansas City   |                                                                           | Program                                        |        |
| University of Kansas School of Medicine KU - MPH Program Wichita       |                                                                           | Program                                        |        |
| University of Kentucky College of Public Health                        | Biostatistics                                                             | School                                         |        |
|                                                                        | Epidemiology                                                              | School                                         |        |
|                                                                        | Gerontology                                                               | School                                         |        |
|                                                                        | Health behaviour                                                          | School                                         |        |
|                                                                        | Health management and policy                                              | School                                         |        |
|                                                                        | Preventative medicine and environmental health                            | School                                         |        |
|                                                                        | University of Louisville School of Public Health and Information Sciences | Biostatistics and bioinformatics               | School |
|                                                                        |                                                                           | Environmental and occupational health sciences | School |
| Epidemiology and population health                                     |                                                                           | School                                         |        |
| Health management and systems science                                  |                                                                           | School                                         |        |
| Health promotion and behavioural science                               |                                                                           | School                                         |        |
| Health hazards preparedness                                            |                                                                           | School                                         |        |
| University of Maryland School of Public Health                         |                                                                           | Behavioural and community health               | School |
|                                                                        | Applied environmental health                                              | School                                         |        |
|                                                                        | Epidemiology and biostatistics                                            | School                                         |        |
|                                                                        | Family science                                                            | School                                         |        |
|                                                                        | Health services administration                                            | School                                         |        |
|                                                                        | Kinesiology                                                               | School                                         |        |
| University of Massachusetts-Amherst School of Public Health and Health | Biostatistics                                                             | School                                         |        |
|                                                                        | Community health education                                                | School                                         |        |
|                                                                        | Environmental health sciences                                             | School                                         |        |
|                                                                        | Epidemiology                                                              | School                                         |        |

|                                                                         |                                                     |         |
|-------------------------------------------------------------------------|-----------------------------------------------------|---------|
| University of Miami Department of Public Health Sciences                | Health policy and management                        | School  |
| University of Michigan School of Public Health                          | Biostatistics                                       | Program |
|                                                                         | Environmental health sciences                       | School  |
|                                                                         | Epidemiology                                        | School  |
|                                                                         | Health behaviour and health education               | School  |
|                                                                         | Health management and policy                        | School  |
| University of Minnesota School of Public Health                         | Biostatistics                                       | School  |
|                                                                         | Environmental health science                        | School  |
|                                                                         | Epidemiology                                        | School  |
|                                                                         | Health policy and management                        | School  |
| University of Nebraska Medical Centre College of Public Health          | Biostatistics                                       | School  |
|                                                                         | Environmental, agricultural and occupational health | School  |
|                                                                         | Epidemiology                                        | School  |
|                                                                         | Health promotion, social and behavioural health     | School  |
|                                                                         | Health services research and administration         | School  |
| University of New England Graduate Programs in Public Health            |                                                     | Program |
| University of New Mexico Public Health Program                          |                                                     | Program |
| University of North Carolina Gillings School of Global Public Health    | Biostatistics                                       | School  |
|                                                                         | Environmental sciences and engineering              | School  |
|                                                                         | Epidemiology                                        | School  |
|                                                                         | Health behaviour                                    | School  |
|                                                                         | Health policy and management                        | School  |
|                                                                         | Maternal and child health                           | School  |
|                                                                         | Nutrition                                           | School  |
|                                                                         | Public health leadership                            | School  |
| University of North Texas Health Science Centre School of Public Health |                                                     | School  |
| University of Oklahoma Health Sciences Centre College of Public Health  | Biostatistics and epidemiology                      | School  |
|                                                                         | Health administration and policy                    | School  |
|                                                                         | Health promotion sciences                           | School  |
|                                                                         | Occupational and environmental health               | School  |
| University of Pennsylvania Master of Public Health Program              |                                                     | Program |
| University of Pennsylvania Master of Public Health Program - Centre for |                                                     | Program |
| University of Pittsburgh Graduate School of Public Health               | Behavioural and community health sciences           | School  |
|                                                                         | Biostatistics                                       | School  |
|                                                                         | Environmental and occupational health               | School  |
|                                                                         | Epidemiology                                        | School  |
|                                                                         | Health policy and management                        | School  |
|                                                                         | Human genetics                                      | School  |

|                                                                                   |                                                 |         |
|-----------------------------------------------------------------------------------|-------------------------------------------------|---------|
| University of South Carolina Arnold School of Public Health                       | Infectious diseases and microbiology            | School  |
|                                                                                   | Communication sciences                          | School  |
|                                                                                   | Environmental health sciences                   | School  |
|                                                                                   | Epidemiology and biostatistics                  | School  |
|                                                                                   | Exercise science                                | School  |
|                                                                                   | Health policy and management                    | School  |
| University of South Florida College of Public Health                              | Health promotion, education and behaviour       | School  |
|                                                                                   | Community and family health                     | School  |
|                                                                                   | Environmental and occupational health           | School  |
|                                                                                   | Epidemiology and biostatistics                  | School  |
|                                                                                   | Global health                                   | School  |
| University of Southern California MPH Program                                     | Health policy and management                    | School  |
|                                                                                   | Health education and promotion                  | Program |
|                                                                                   | Biostatistics and epidemiology                  | Program |
|                                                                                   | Health communication                            | Program |
|                                                                                   | Child and family health                         | Program |
|                                                                                   | Global health leadership                        | Program |
|                                                                                   | Public health policy                            | Program |
| University of Tennessee Department of Public Health                               | Environmental health                            | Program |
|                                                                                   |                                                 | Program |
| University of Texas Medical Branch at Galveston Graduate Program in Public Health |                                                 | Program |
| University of Texas School of Public Health                                       | Management policy and community health          | School  |
|                                                                                   | Health promotion and behavioural sciences       | School  |
|                                                                                   | Biostatistics                                   | School  |
|                                                                                   | Epidemiology, human genetics and environmental  | School  |
|                                                                                   | Biostatistics                                   | Program |
| University of Virginia MPH Program                                                | Health policy, management and regulation        | Program |
|                                                                                   | Comparative effectiveness, quality and outcomes | Program |
|                                                                                   | Data sciences                                   | Program |
|                                                                                   | Bioethics                                       | Program |
|                                                                                   |                                                 | Program |
| University of Washington School of Public Health                                  | Biostatistics                                   | School  |
|                                                                                   | Environmental health and occupational sciences  | School  |
|                                                                                   | Epidemiology                                    | School  |
|                                                                                   | Global health                                   | School  |
|                                                                                   | Health services                                 | School  |
| Vanderbilt University Institute for Medicine and Public Health                    | Biomedical informatics                          | Program |
|                                                                                   | Biostatistics                                   | Program |
|                                                                                   | Epidemiology                                    | Program |
|                                                                                   | Public health                                   | Program |



|                                                                        |                                             |         |
|------------------------------------------------------------------------|---------------------------------------------|---------|
| Virginia Commonwealth University MPH Program                           |                                             | Program |
| Washington University in St. Louis Brown School Public Health Programs |                                             | Program |
| West Virginia University School of Public Health                       | Biostatistics                               | Program |
|                                                                        | Epidemiology                                | Program |
|                                                                        | Health policy management and leadership     | Program |
|                                                                        | Occupational, environmental health sciences | Program |
|                                                                        | Social and behavioural sciences             | Program |
| Yale School of Public Health                                           | Biostatistics                               | School  |
|                                                                        | Chronic disease epidemiology                | School  |
|                                                                        | Environmental health sciences               | School  |
|                                                                        | Epidemiology of microbial diseases          | School  |
|                                                                        | Global health                               | School  |
|                                                                        | Health policy and management                | School  |
|                                                                        | Social and behavioural sciences             | School  |
| Arcadia University MPH program                                         |                                             | Program |
| Armstrong State University MPH program in Community Health Education   |                                             | Program |
| Baylor University MPH program                                          |                                             | Program |
| Benedictine University MPH program*                                    |                                             | Program |
| Brigham Young University MPH program in Health Promotion               |                                             | Program |
| Brown University MPH program                                           |                                             | Program |
| California State University Fresno                                     |                                             | Program |
| California State University Fullerton                                  |                                             | Program |
| California State University Long Beach                                 |                                             | Program |
| California State University Northridge                                 |                                             | Program |
| Case Western Reserve University MPH Program*                           |                                             | Program |
| Central New York MPH Program*                                          |                                             | Program |
| Charles Drew University of Medicine and Science MPH program in Urban   |                                             | Program |
| Claremont Graduate University MPH program                              |                                             | Program |
| Consortium of Eastern Ohio MPH Program                                 |                                             | Program |
| DePaul University MPH program                                          |                                             | Program |
| Des Moines University MPH program                                      |                                             | Program |
| East Carolina University                                               |                                             | Program |
| East Stroudsburg University MPH program in Community Health Education  |                                             | Program |
| Eastern Kentucky University Public Health Program                      |                                             | Program |
| Eastern Virginia Medical School MPH program                            |                                             | Program |
| Florida State University MPH program                                   |                                             | Program |
| George Mason University MPH program                                    |                                             | Program |
| Idaho State University MPH program                                     |                                             | Program |
| Purdue University Indianapolis Public Health Program^                  |                                             | Program |

|                                                                          |                                       |         |
|--------------------------------------------------------------------------|---------------------------------------|---------|
| Indiana University at Bloomington MPH program                            |                                       | Program |
| Jackson State university Public Health program                           |                                       | Program |
| Kansas State University MPH program                                      |                                       | Program |
| Medical College of Wisconsin MPH program*                                |                                       | Program |
| Meharry Medical College MSc in Public Health program                     |                                       | Program |
| Missouri State University MPH program                                    |                                       | Program |
| Morehouse School of Medicine MPH program*                                |                                       | Program |
| Morgan State University Public Health Program                            |                                       | Program |
| National University MPH program                                          |                                       | Program |
| New Mexico State University MPH program in Community Health Education    |                                       | Program |
| Northern Illinois University MPH program                                 |                                       | Program |
| Northwest Ohio Consortium for Public Health                              |                                       | Program |
| Nova South-eastern University MPH program                                |                                       | Program |
| San Francisco State University MPH program in Community Health Education |                                       | Program |
| San Jose State University MPH Program in Community Health Education      |                                       | Program |
| Simon Fraser University Public Health Program                            |                                       | Program |
| Southern Connecticut State University Public Health Program              |                                       | Program |
| Southern Illinois University Carbondale MPH program*                     |                                       | Program |
| University of Alaska, Anchorage MPH program                              |                                       | Program |
| University of Connecticut Graduate Program in Public Health              |                                       | Program |
| University of Illinois at Urbana-Champaign MPH program                   |                                       | Program |
| University of Maryland at Baltimore, MPH Program                         |                                       | Program |
| University of Missouri, Columbia MPH program                             |                                       | Program |
| University of Montana MPH program                                        |                                       | Program |
| University of Nevada Las Vega MPH program                                | Environmental and Occupational health | Program |
|                                                                          | Epidemiology and Biostatistics        | Program |
|                                                                          | Healthcare administration and policy  | Program |
|                                                                          | Social and behavioural health         | Program |
| University of Nevada, Reno                                               |                                       | Program |
| University of New Hampshire MPH program                                  |                                       | Program |
| University of North Carolina, Greensboro MPH program in Community        |                                       | Program |
| University of North Carolina at Charlotte Public Health Programs         |                                       | Program |
| University of North Florida MPH program                                  |                                       | Program |
| University of Rochester MPH program                                      | Epidemiology                          | Program |
|                                                                          | Health policy and outcomes research   | Program |
|                                                                          | Social and behavioural sciences       | Program |
| University of San Francisco MPH program                                  |                                       | Program |
| University of Southern Mississippi MPH program                           |                                       | Program |
| University of Texas at El Paso MPH program                               |                                       | Program |

|                                                                   |         |
|-------------------------------------------------------------------|---------|
| University of Utah Public Health program*                         | Program |
| University of West Florida MPH Program                            | Program |
| University of Wisconsin La Crosse MPH program in Community Health | Program |
| University of Wisconsin Madison MPH program                       | Program |
| Virginia Tech Public Health Program                               | Program |
| Wayne State University MPH program                                | Program |
| West Chester University MPH program                               | Program |
| Western Kentucky University Public Health Programs                | Program |
| Westminster College Public Health Program*                        | Program |
| Wright State University MPH program                               | Program |

\*No directory available or accessible

^CEPH listing duplicated with Indiana Fairbanks School of Public Health
